1 The effect of natural terrestrial gamma radiation emissions and  
2 environmental radon levels on the incidence of cutaneous squamous cell  
3 carcinoma of the head and neck.

4

5 Ivan Couto-González<sup>1</sup>, Jorge Arenaz-Búa<sup>2</sup>, Antonio Taboda-Suárez<sup>1</sup>, Abel  
6 García-García<sup>2</sup>.

7

8 <sup>1</sup> Plastic and Reconstructive Surgery Department. University Hospital of  
9 Santiago de Compostela, Santiago de Compostela, Spain.

10 <sup>2</sup> Oral and Maxillofacial Surgery Department. University Hospital of Santiago de  
11 Compostela, Santiago de Compostela, Spain.

12

13 Corresponding author:

14 [ivan.couto.gonzalez@sergas.es](mailto:ivan.couto.gonzalez@sergas.es) (ICG)

15

16

17

18 Acknowledgments.

19 We would like to thank Mr Paul Jonathan Lacey B.A. for his kind willingness to  
20 proofread the English manuscript.

21 NOTE: This preprint reports new research that has not been certified by peer review and should not be used to guide clinical practice.

## 22 **Abstract**

23 The effects of ionising radiation on the development of cutaneous squamous  
24 cell carcinoma have been previously studied in environments in which the levels  
25 of ionising radiation have been increased by artificial sources. The purpose of  
26 this study is to determine the role that environmental radon concentration and  
27 natural gamma radiation emissions may play in the development of head and  
28 neck cutaneous squamous cell carcinoma in a geographical area which is  
29 known to have high levels of radon and natural terrestrial gamma radiation  
30 emissions. A total of 284 patients diagnosed with cutaneous squamous cell  
31 carcinoma during the 26-month observation period were included in the study.  
32 The overall incidence was 37.33 cases/100,000 people-year. The mean of  
33 environmental radon concentration according to their council of residence was  
34 116.69 Bq/m<sup>3</sup> (40.05) and the mean of natural terrestrial gamma radiation  
35 emitted according to their council of residence was 14.25 µRad/hour (3.86). The  
36 multiple linear regression analysis revealed that only mean natural terrestrial  
37 gamma radiation emissions in the council of residence ( $P < 0.05$ ), carrying out  
38 an outdoor profession ( $P < 0.05$ ) and the mean number of hours of sunlight per  
39 year in the council of residence ( $P = 0.03$ ) were found to have statistical  
40 significance on the incidence of head and neck cutaneous squamous cell  
41 carcinoma. Emissions of natural terrestrial gamma radiation have never been  
42 proposed as a factor having an influence on the development of cutaneous  
43 neoplasms. The implications that this could have in areas with naturally high  
44 terrestrial gamma radiation emissions should be more exhaustively studied to  
45 assess the true weight of this factor.

## 46 Introduction

47 Cutaneous squamous cell carcinoma (cSCC) is the second most frequent non-  
48 melanoma skin neoplasm diagnosed worldwide after basal cell carcinoma  
49 (BCC). In recent decades, increasing incidence rates of BCC and cSCC have  
50 been reported<sup>1</sup>. The effects of ionising radiation on the development of cSCC  
51 have been studied in different series. Unlike the general increase in incidence  
52 that occurs in BCC, the results in the case of cSCC are more variable<sup>2-4</sup>. These  
53 series are usually situated in environments in which the levels of ionising  
54 radiation have been increased by artificial sources, usually in workplaces or in  
55 the study of the effects caused by the atomic bombs dropped on Japan in the  
56 last days of World War II.

57 It has been demonstrated that natural terrestrial radiation can have an influence  
58 on the development of certain neoplasms, such as lung cancer, in environments  
59 with high levels of the natural radioisotope <sup>222</sup>Rn<sup>5</sup>. Some studies have sought to  
60 find a link between environmental exposure to radon and an increase in the  
61 incidence of different skin neoplasms with varying results<sup>6-9</sup>. Through the  
62 release of alpha particles, radon is responsible for 55% of the ionising radiation  
63 naturally received by humans<sup>10</sup>. <sup>222</sup>Rn particles concentrate a large amount of  
64 energy, which, after inhalation of <sup>222</sup>Rn, could explain the pathogenesis of lung  
65 cancer. However, alpha particles have an extremely low capacity of tissue  
66 penetration, leading to serious doubts about whether they could have any  
67 mutagenic effect on cells in the basal layer of the epidermis, with the exception  
68 of areas with thin skin not usually protected by clothing, such as the facial  
69 region<sup>11</sup>.

70 Gamma particles are a type of massless electromagnetic radiation consisting of  
71 photons. Their high, massless energy allows them to penetrate matter more  
72 deeply than alpha and beta radiation, causing damage to cellular genetic  
73 material<sup>12</sup>. The role that natural emissions of gamma radiation from terrestrial  
74 emission may play in the development of skin neoplasms has not been studied  
75 to date.

76 The aim of this study is to determine the role that environmental radon  
77 concentration and natural gamma radiation emissions may play in the  
78 development of head and neck cSCC in a geographical area which is known to  
79 have high levels of radon and natural terrestrial gamma radiation emissions. In  
80 addition, other factors classically related to the development of cSCC will be  
81 analysed.

82

## 83 **Material and Methods**

### 84 **Patients**

85 All patients diagnosed with head and neck cSCC over a 26-month period  
86 ranging from November 2018 to December 2020 in our healthcare area were  
87 located through the database of the Anatomical Pathology department. This is  
88 the only department capable of carrying out histopathological analyses within  
89 the study area. Therefore, the cases processed correspond to the total cases  
90 diagnosed. The inclusion criterion was the diagnosis of head and neck cSCC  
91 during the period of study. Patients already included in the database who  
92 presented with a second head and neck cSCC during the study period were

93 excluded. In the case of synchronous cSCC, the most severe tumour was  
94 always that included in the study according to the criteria of the presence of  
95 regional lymph node or distant metastasis, infiltration of local structures, tumour  
96 differentiation, tumour diameter and infiltration depth. Patients with partial  
97 follow-up in other centres for whom it was not possible to gain complete access  
98 to their clinical history were also excluded from the study.

### 99 **Study protocol**

100 A study protocol was developed taking into account demographic, occupational  
101 and personal history factors of the patients which could have a known influence  
102 on the development of cSCC. Clinical and histopathological data of the tumour  
103 were also recorded (Table-1). The study protocol received the prior approval of  
104 the local ethics committee.

### 105 **Calculation of incidence, hours of sunlight per day, environmental levels 106 of radon and natural terrestrial gamma radiation emissions.**

107 In order to calculate the incidence of cSCC during the study period, the  
108 demographic data for the local councils studied published by the Spanish  
109 National Statistics Institute (Instituto Nacional de Estadística) for the year 2020  
110 were taken into account<sup>13</sup>.

111 Hours of sunlight in the councils studied were obtained from the tables for the  
112 year 2020 provided by Climate Data<sup>14</sup>.

113 Geometric means of environmental radon concentrations for the studied  
114 councils were obtained from the open-access data provided by the Galician

115 Radon Laboratory (Laboratorio de Radón de Galicia) of the University of  
116 Santiago de Compostela (Spain)<sup>15</sup>.

117 Natural gamma radiation means were obtained from the MARNA project,  
118 carried out by the Spanish Nuclear Safety Council (Consejo de Seguridad  
119 Nuclear)<sup>16</sup>.

120

## 121 **Statistical study**

122 The data were collated on a spreadsheet (Microsoft Excel Office 365) and  
123 processed with IBM SPSS statistics 22.0 (IBM Corp., Armonk, New York,  
124 U.S.A.). The Kolmogorov-Smirnov goodness-of-fit test was employed to assess  
125 the normality of the distributions. The study of the correlations between the  
126 different variables was carried out using the Pearson test for parametric  
127 distributions and the Spearman test in the case of non-parametric distributions  
128 or if qualitative variables were used. Multiple linear regression analysis was  
129 employed to study the influence of the different variables on the incidence of  
130 cSCC.

131

## 132 **Results**

133 A total of 284 patients (165 males and 119 females) diagnosed with cSCC  
134 during the 26-month observation period were included in the study. The mean  
135 age at tumour diagnosis was 83.15 (8.44) years (81.55 (8.43) years in males  
136 and 85.38 (7.96) years in females). The overall incidence was 37.33  
137 cases/100,000 people-year, with a maximum of 131.96 cases/100,000 people-

138 year and a minimum of 4.95 cases/100,000 people-year (Figure-1). The  
139 incidence was 39.38 cases/100,000 people-year in males and 34.46  
140 cases/100,000 people-year in females.

141 The average hours of sunlight per year in the studied area was 2350.23 hours  
142 (185.06), with a maximum of 2717.45 hours and a minimum of 2020.00 hours.

143 A total of 62.3% (177) of the patients had been employed in professions with a  
144 preference for outdoor activity (Table-2). It was not possible to establish the  
145 profession of the patient in 4.6% (13) of the cases or whether the activity was  
146 mainly carried out indoors or outdoors.

147 Only 4.9% (14) of the patients were active smokers at the time of cSCC  
148 diagnosis, 23.6% (67) were former smokers and 59.5% (169) had never  
149 smoked. It was not possible to firmly establish this factor for 12% (34) of the  
150 patients included in the study.

151 No previous diagnosis of a non-cutaneous malignancy had been made in 27.1%  
152 (77) of the patients included in the study. The most frequent tumours were  
153 prostate adenocarcinoma (17 cases) and rectosigmoid cancer (10 cases). In  
154 30.3% (86) of the cases, a previous diagnosis of other malignant skin lesions  
155 had been established. In 25.0% (71) of the patients, there was another  
156 synchronous malignant skin lesion at the time of diagnosis. In 52.11% (37) of  
157 these cases, the tumours were BCCs, 42.25% (30) of the patients had other  
158 cSCCs which were smaller or located in an area other than the head and neck,  
159 4.22% (3) had basosquamous carcinomas and, in one case (1.40%), the  
160 synchronous tumour was a lentigo maligna melanoma. In 83.09% (59) of the

161 cases, the synchronous tumour was diagnosed in the skin of the head and neck  
162 area.

163 Immunosuppression was present in 10.9% (31) of the patients at the time of  
164 cSCC diagnosis, either secondary to chronic steroid treatment or to an  
165 advanced oncological process.

166 The most frequent location of the tumours was the cheek area (54; 19.0%),  
167 followed by the frontotemporal region (51; 17.9%) and the scalp (43; 15.1%)  
168 (Table-3).

169 The mean of environmental radon concentration for the patients included in the  
170 study according to their council of residence was 116.69 Bq/m<sup>3</sup> (40.05), with a  
171 minimum of 23.58 Bq/m<sup>3</sup> and a maximum of 257.64 Bq/m<sup>3</sup> (Figure-2). The  
172 mean of natural terrestrial gamma radiation emitted according to their council of  
173 residence was 14.25 µRad/hour (3.86), with a maximum of 22 µRad/hour and a  
174 minimum of 7 µRad/hour (Figure-3).

175 The correlation analysis between the incidence of cSCC and the different  
176 variables revealed that there was a statistically significant relationship between  
177 cSCC incidence and mean levels of environmental radon in the council of  
178 residence ( $P = 0.02$ ), the mean natural terrestrial gamma radiation emissions in  
179 the council of residence ( $P < 0.05$ ), carrying out an outdoor profession ( $P <$   
180  $0.05$ ) and the mean number of hours of sunlight per year in the council of  
181 residence ( $P < 0.05$ ). The multiple linear regression analysis finally excluded  
182 environmental radon levels from the model ( $P = 0.62$ ). Therefore, in the final  
183 model, only mean natural terrestrial gamma radiation emissions in the council of  
184 residence ( $P < 0.05$ ), carrying out an outdoor profession ( $P < 0.05$ ) and the



185 mean number of hours of sunlight per year in the council of residence ( $P = 0.03$ )  
186 were found to have statistical significance on the incidence of head and neck  
187 cSCC (Figure-4).

188 As far as the remaining clinical and histopathological variables included in the  
189 study protocol are concerned, in no case was it possible to establish a  
190 statistically significant relationship with the mean level of environmental radon,  
191 mean natural terrestrial gamma radiation emissions, the mean number of hours  
192 of sunlight per year in the council of residence or with occupational solar  
193 exposure (Table-4).

194 Taking the indoor EURATOM safety level for natural gamma radiation  
195 emissions of 1 mSv/year ( $11.41 \mu\text{Rad}/\text{hour}$ )<sup>17</sup> as a reference, 83.10% (236) of  
196 the patients included in our study resided in councils in which natural terrestrial  
197 gamma radiation emissions were higher than the recommended levels. The  
198 incidence of head and neck cSCC in these councils was 39.60 cases/100,000  
199 people-year, whereas the incidence in councils with natural terrestrial gamma  
200 radiation emissions below the recommended EURATOM levels was 39.46  
201 cases/100,000 people-year (Figure-5). Although no statistically significant  
202 difference can be observed between the two groups, the P value is extremely  
203 close to statistical significance ( $P = 0.05$ ). The Relative Risk (RR) of populations  
204 living in councils above the recommended EURATOM values was 1.00.

205

## 206 **Discussion**

207 The incidence of head and neck cSCC in our study (37.33 cases/100,000  
208 people-year) shows very similar values to those obtained from the meta-  
209 analysis published by Tejera-Vaquerizo (38.16 cases/100,000 people-year), the  
210 most exhaustive study carried out to date in Spain in an attempt to determine  
211 the incidence of different skin tumours<sup>18</sup>. It is striking that the incidence is similar  
212 when solar exposure, the main risk factor in the development of cSCC, is  
213 remarkably lower in our series (2350.23 hours of sun/year) than the average  
214 values for the country as a whole (2500 hours/year) or in comparison with  
215 southern (Seville: 3526 hours/year, Córdoba: 3316 hours/year) or  
216 Mediterranean regions (Alicante: 3397 hours/year, Murcia: 3348 hours/year,  
217 Mallorca: 3098 hours/year). Based on the results obtained from our study,  
218 carried out in a limited area in the northwest of the Iberian Peninsula with an  
219 oceanic climate, it can be concluded that the low values of solar exposure  
220 observed in comparison with the rest of the country must be compensated by  
221 another factor to obtain similar values of head and neck cSCC incidence.

222 The role that environmental radon plays in the development of certain tumours,  
223 as in the case of lung cancer, has already been clearly demonstrated. Indeed, it  
224 is now considered to be the first cause of lung cancer among non-smokers<sup>19</sup>.  
225 High levels of environmental radon have also been linked to an increased  
226 incidence of stomach cancer and related mortality<sup>20-22</sup>, brain and central  
227 nervous system tumours<sup>8,23</sup> and leukaemia<sup>24</sup>.

228 The most stable and frequent isotope in the natural environment is <sup>222</sup>Rn, which  
229 results from the decay of <sup>238</sup>U and has a half-life of 3.824 days. Radon and its  
230 progeny, especially short half-life radioisotopes such as <sup>218</sup>Po and <sup>214</sup>Po,  
231 continue their decay through the emission of alpha particles<sup>25</sup>. Alpha particles

232 have a short range of absorption and low capacity to penetrate the outer layers  
233 of the skin. Thus, alpha particles cannot easily reach the basal cell layer of the  
234 epidermis, where a theoretical carcinogenic effect would take place. This is the  
235 main limiting factor in models which seek to relate environmental radon to the  
236 development of cSCC. For this reason, the possible aetiological relationship  
237 between radon and tumour locations other than the lung, as well as the  
238 pathogenic mechanism, are controversial<sup>26</sup>. To our knowledge, only the study  
239 carried out by Wheeler et al. in southwest England has found a significant  
240 association between an increased incidence of cSCC and high levels of  
241 environmental radon. These results were sustained after adjustment for  
242 potential confounders<sup>27</sup>. Other studies have found an increase in the overall  
243 incidence of non-melanoma skin cancers<sup>6</sup>, although not specifically of cSCC, in  
244 areas with environmental radon levels above 100 Bq/m<sup>3</sup> when compared to  
245 areas with average radon levels below 60 Bq/m<sup>3</sup>. Other studies have found an  
246 increase in the incidence of BCC but not of cSCC<sup>8</sup>. An interesting study  
247 analysing mortality and cancer incidence among uranium miners exposed to  
248 low and moderate doses of environmental radon in the Czech Republic  
249 between 1977 and 1992 showed that real incidence of non-melanoma skin  
250 cancers was lower than the expected incidence<sup>29</sup>.

251 The geographical area in which our study was carried out is characterised by  
252 the existence of levels of environmental radon above the recommended values  
253 in many locations<sup>29</sup>. An association has been demonstrated with an increase in  
254 lung<sup>30</sup>, oesophageal<sup>31</sup> and brain cancer mortality<sup>32</sup>. The mean value for the local  
255 councils included in our study was 116.69 Bq/m<sup>3</sup>, which falls within the risk  
256 group as defined by Etherington<sup>6</sup>. Safety or action values established by

257 different governments and agencies are usually established between 200 and  
258 400 Bq/m<sup>3</sup>, although it is known that the risk of developing lung cancer has a  
259 linear growth with long-term exposure to environmental radon, with no evidence  
260 of a defined threshold level. This increase in incidence has been found to be  
261 statistically significant even for average values below 200 Bq/m<sup>3</sup><sup>33</sup>. In our study,  
262 the correlation of raw data established some degree of statistical significance  
263 between environmental levels of radon and incidence of head and neck cSCC.  
264 However, in the end, the multiple linear regression model excluded  
265 environmental levels of radon as a factor influencing the incidence of cSCC.

266 Although it has never been postulated as a specific cause of the development of  
267 cutaneous neoplasms, we believe that exposure to high levels of natural  
268 terrestrial gamma radiation emissions could have an influence on our study  
269 population<sup>34</sup>. Natural radionuclides, especially <sup>40</sup>K from soil and food, are the  
270 most frequent source of gamma radiation exposure<sup>35</sup>. Other radionuclides  
271 frequently found in nature, depending on the geographical area, are <sup>238</sup>U, <sup>235</sup>U  
272 and <sup>232</sup>Th and their progeny.

273 In the early days of therapeutic ionising radiation, the development of cSCC on  
274 the unprotected extremities of technicians and workers exposed to radiation  
275 was described<sup>36</sup>, along with an excess in overall mortality due to skin cancer<sup>37</sup>.

276 Exposure to high-dose gamma radiation may have an influence on the  
277 development of cSCC<sup>38</sup>. In the case of exposure to moderate doses, there  
278 appears to be a clear impact on the development of BCC, although this is not so  
279 clear in the case of cSCC<sup>39-41</sup>. Lichter et al. demonstrated an increased risk of  
280 cSCC in patients who had undergone previous ionizing radiation therapy due to

281 conditions other than skin cancer. This increased incidence proved close to  
282 statistical significance. The *odds ratio* for cSCC seemed to increase with the  
283 frequency and number of treatments carried out<sup>3</sup>. In the case of low-dose  
284 gamma radiation, Daniels RD et al. linked prolonged exposure to a significant  
285 increase in leukaemia diagnoses<sup>42</sup>. However, it was not until the study carried  
286 out by Azizova et al. in 2021 that a significant relationship was demonstrated  
287 between exposure to low-dose ionising radiation for extended periods of time  
288 and an increase in the incidence of skin tumours<sup>43</sup>. This study, carried out in the  
289 Chelyabinsk region of the Russian Federation among nuclear industry workers,  
290 found that the incidence of non-melanoma skin neoplasms was significantly  
291 associated with cumulative external gamma dose. Relative risk was found to be  
292 significantly increased for both cSCC and BCC. This exposure to low doses of  
293 gamma radiation over long periods of time is the most similar scenario to that  
294 presented in our study, taking into account the fact that no previous study has  
295 ever considered only natural background radiation in order to discover its  
296 influence on cutaneous malignancies.

297

## 298 **Conclusion**

299 In our study, emissions of natural terrestrial gamma radiation, together with  
300 hours of sunlight and predominantly outdoor professions, are the main causes  
301 of the development of cSCC. To date and to the best of our knowledge,  
302 emissions of natural terrestrial gamma radiation have never been proposed as a  
303 factor having an influence on the development of cutaneous neoplasms. The  
304 implications that this could have in areas with naturally high terrestrial gamma

305 radiation emissions, especially in geographical areas in which the classical  
306 studied risk factors for development of cSCC are not so present, should be  
307 more exhaustively studied in order to assess the true weight of this factor.

308

## 309 **REFERENCES**

3101- Keim U, Katalinic A, Holleczeck B, Wakkee M, Garbe C, Leiter U. Incidence,  
311 mortality and trends of cutaneous squamous cell carcinoma in Germany, the  
312 Netherlands, and Scotland. *Eur J Cancer*. 2023;183: 60-8.

313

3142- Gallagher RP, Bajdik CD, Fincham S, Hill GB, Keefe AR, Coldman A et al.  
315 Chemical exposures, medical history, and risk of squamous and basal cell  
316 carcinoma of the skin. *Cancer Epidemiol Biomarkers Prev*. 1996;5(6): 419-24.

317

3183- Lichter MD, Karagas MR, Mott LA, Spencer SK, Stukel TA, Greenberg ER.  
319 Therapeutic ionizing radiation and the incidence of basal cell carcinoma and  
320 squamous cell carcinoma. The New Hampshire Skin Cancer Study Group. *Arch*  
321 *Dermatol*. 2000;136(8): 1007-11.

322

3234- Kishikawa M, Koyama K, Iseki M, Kobuke T, Yonehara S, Soda M et al.  
324 Histologic characteristics of skin cancer in Hiroshima and Nagasaki:  
325 background incidence and radiation effects. *Int J Cancer*. 2005;117(3): 363-9.

326

3275- Martin-Gisbert L, Ruano-Ravina A, Varela-Lema L, Penabad M, Giraldo-Osorio  
328 A, Candal-Pedreira C et al. Lung cancer mortality attributable to residential

329 radon: a systematic scoping review. *J Expo Sci Environ Epidemiol*. 2022.  
330 Forthcoming.

331  
3326- Etherington DJ, Pheby DF, Bray FI. An ecological study of cancer incidence and  
333 radon levels in South West England. *Eur J Cancer*. 1996;32A(7):1189-97.

334  
3357- Wheeler BW, Kothencz G, Pollard AS. Geography of non-melanoma skin  
336 cancer and ecological associations with environmental risk factors in England.  
337 *Br J Cancer*. 2013;109(1): 235-41.

338  
3398- Bräuner EV, Andersen ZJ, Andersen CE, Pedersen C, Gravesen P, Ulbak K et  
340 al. Residential radon and brain tumour incidence in a Danish cohort. *PLoS One*.  
341 2013;8(9): e74435.

342  
3439- Barbosa-Lorenzo R, Barros-Dios JM, Raíces Aldrey M, Cerdeira Caramés S,  
344 Ruano-Ravina A. Residential radon and cancers other than lung cancer: a  
345 cohort study in Galicia, a Spanish radon-prone area. *Eur J Epidemiol*.  
346 2016;31(4): 437-41.

347  
34810- Degu Belete G, Alemu Anteneh Y. General Overview of Radon Studies in  
349 Health Hazard Perspectives. *J Oncol*. 2021;2021: 6659795.

350  
35111-The biological basis for dose limitation in the skin. A report of a Task Group of  
352 Committee 1 of the International Commission on Radiological Protection. *Ann*  
353 *ICRP*. 1991;22(2):1-104.

354

35512-Radiation basics. United States Environmental Protection Agency, EPA [cited:  
356 10 April 2023]. In: Radiation basics EPA. Available in:  
357 <https://www.epa.gov/radiation/radiation-basics>.

358

35913- Padrón. Instituto Nacional de Estadística, INE [cited 10 April 2023]. In: Padrón.  
360 Población por municipios. INE. Available in:  
361 [https://www.ine.es/dyngs/INEbase/es/categoria.htm?c=Estadistica\\_P&cid=1254](https://www.ine.es/dyngs/INEbase/es/categoria.htm?c=Estadistica_P&cid=1254734710990)  
362 [734710990](https://www.ine.es/dyngs/INEbase/es/categoria.htm?c=Estadistica_P&cid=1254734710990).

363

36414- Galicia, España. Climate Data [cited 10 April 2023]. In: Climate Data. Available  
365 in: <https://es.climate-data.org/>.

366

36715- Laboratorio del radón de Galicia [cited 10 April 2023]. In: Tablas de mediciones.  
368 Radón en Galicia. Laboratorio del radón en Galicia. Available in:  
369 <https://radon.gal/radon-en-galicia/tablas-mediciones/?lang=es>.

370

37116- Mapa de radiación natural en España (MARNA) Mapa. Consejo de Seguridad  
372 Nuclear, CSN [cited 10 April 2023]. In: Mapa de radiación natural en España  
373 (MARNA). Mapas de radiación natural. Monografías. Consejo de Seguridad  
374 Nuclear. Available in: [https://www.csn.es/mapa-de-radiacion-gamma-natural-](https://www.csn.es/mapa-de-radiacion-gamma-natural-marna-mapa)  
375 [marna-mapa](https://www.csn.es/mapa-de-radiacion-gamma-natural-marna-mapa).

376

37717- Council directive 2013/59/EURATOM of 5 December 2013. Official Journal of  
378 the European Union 2014.01.17 L13/1.

379



38018-Tejera-Vaquerizo A, Descalzo-Gallego MA, Otero-Rivas MM, Posada-García C,  
381 Rodríguez-Pazos L, Pastushenko I et al. Skin Cancer Incidence and Mortality in  
382 Spain: A Systematic Review and Meta-Analysis. *Actas Dermosifiliogr.*  
383 2016;107(4) :318-28.

384  
38519- Cheng ES, Egger S, Hughes S, Weber M, Steinberg J, Rahman B eta al.  
386 Systematic review and meta-analysis of residential radon and lung cancer in  
387 never-smokers. *Eur Respir Rev.* 2021;30(159): 200230.

388

38920- Kjellberg S, Wiseman JS. The relationship of radon to gastrointestinal  
390 malignancies. *Am Surg.* 1995;61(9): 822-5.

391  
39221- Darby SC, Whitley E, Howe GR, Hutchings SJ, Kusiak RA, Lubin JH et al.  
393 Radon and cancers other than lung cancer in underground miners: a  
394 collaborative analysis of 11 studies. *J Natl Cancer Inst.* 1995;87(5): 378-84.

395  
39622- Messier KP, Serre ML. Lung and stomach cancer associations with  
397 groundwater radon in North Carolina, USA. *Int J Epidemiol.* 2017;46(2): 676-  
398 685.

399  
40023-Ruano-Ravina A, Aragonés N, Kelsey KT, Pérez-Ríos M, Piñeiro-Lamas M,  
401 López-Abente G et al. Residential radon exposure and brain cancer: an  
402 ecological study in a radon prone area (Galicia, Spain). *Sci Rep.* 2017;7(1):  
403 3595.

404  
40524- Rericha V, Kulich M, Rericha R, Shore DL, Sandler DP. Incidence of leukemia,  
406 lymphoma, and multiple myeloma in Czech uranium miners: a case-cohort  
407 study. *Environ Health Perspect.* 2006;114(6): 818-22.

40825- UNSCEAR (2000) United Nations Scientific Committee on the Effects of Atomic  
409 Radiation Sources, Effects and Risks of Ionizing Radiation. United Nations,  
410 New York.

411

41226- Mozzoni P, Pinelli S, Corradi M, Ranzieri S, Cavallo D, Poli D.  
413 Environmental/Occupational Exposure to Radon and Non-Pulmonary Neoplasm  
414 Risk: A Review of Epidemiologic Evidence. Int J Environ Res Public Health.  
415 2021;18(19): 10466.

416

41727-Wheeler BW, Allen J, Depledge MH, Curnow A. Radon and skin cancer in  
418 southwest England: an ecologic study. Epidemiology. 2012;23(1): 44-52.

419

42028- Kelly-Reif K, Sandler DP, Shore D, Schubauer-Berigan M, Troester MA,  
421 Nylander-French L, Richardson DB. Mortality and cancer incidence among  
422 underground uranium miners in the Czech Republic 1977-1992. Occup Environ  
423 Med. 2019;76(8): 511-518.

424

42529- Ruano-Ravina A, Narocki C, López-Jacob MJ, García Oliver A, Calle Tierno  
426 MC, Peón-González J et al. Indoor radon in Spanish workplaces. A pilot study  
427 before the introduction of the European Directive 2013/59/Euratom. Gac Sanit.  
428 2019;33(6): 563-567.

429

43030-Pérez-Ríos M, Barros-Dios JM, Montes-Martínez A, Ruano-Ravina A.  
431 Attributable mortality to radon exposure in Galicia, Spain. Attributable mortality  
432 to radon exposure in Galicia, Spain. Is it necessary to act in the face of this  
433 health problem? BMC Public Health. 2010;10: 256.

43431-Ruano-Ravina A, Aragonés N, Pérez-Ríos M, López-Abente G, Barros-Dios JM.

435 Residential radon exposure and esophageal cancer. An ecological study from

436 an area with high indoor radon concentration (Galicia, Spain). *Int J Radiat Biol.*

437 2014;90(4): 299-305.

438

4392- Ruano-Ravina A, Dacosta-Urbieta A, Barros-Dios JM, Kelsey KT. Radon

440 exposure and tumors of the central nervous system. *Gac Sanit.* 2018;32(6):

441 567-575.

442

44333- Manual de la OMS Sobre El Radón En Interiores: Una Perspectiva de Salud

444 Pública. World Health Organization. ISBN 10: 9243547674. ISBN 13:

445 9789243547671. Editorial: WORLD HEALTH ORGN, 2015. Pp.93.

446

44734- Saghi MH, Mohammadi AA, Ghaderpoori M, Ghaderpoury A, Alinejad A.

448 Estimate the effective dose of gamma radiation in Iran cities: lifetime cancer risk

449 by Monte Carlo simulation model. *Environ Geochem Health.* 2019;41(6):2549-

450 2558.

451

45235- United Nations Scientific Committee on the Effects of Atomic Radiation.

453 Sources and effects of ionizing radiation. New York, USA (2008).

454

45536-Holthusen H, Meyer H, Molineus W. Ehrenbuch der Roentgenologen und

456 Radiologen aller Nationen (Sonderband zur Strahlentherapie 42). Munich:

457 Urban & Schwarzenberg; 1959.

45837- Matanoski G, Seltser P, Sartwell P, et al. The current mortality rates of  
459 radiologists and other physician specialists: Specific causes of death. Am J  
460 Epidemiol. 1975;101: 199±210.

461

46238-Wald N, Berrington de González A, Bridges BA, Easton D, Little MP, Stiller C.  
463 Risk of solid cancers following radiation exposure: estimates for the UK  
464 population. London, UK. Edited by Health Protection Agency, UK; 2011.

465

46639-Ron E, Modan B, Preston D, Alfandary E, Stovall M, Boice JD Jr. Radiation-  
467 induced skin carcinomas of the head and neck. Radiat Res. 1991  
468 Mar;125(3):318-25. PMID: 2000456.

469

47040-Karagas MR, McDonald JA, Greenberg ER, Stukel TA, Weiss JE, Baron JA,  
471 Stevens MM. Risk of basal cell and squamous cell skin cancers after ionizing  
472 radiation therapy. For The Skin Cancer Prevention Study Group. J Natl Cancer  
473 Inst. 1996 Dec 18;88(24):1848-53. doi: 10.1093/jnci/88.24.1848. PMID:  
474 8961975.

475

47641-Shore RE. Radiation-induced skin cancer in humans. Med Pediatr Oncol.  
477 2001;36(5): 549-54.

478

47942-Daniels RD, Schubauer-Berigan MK. A meta-analysis of leukaemia risk from  
480 protracted exposure to low-dose gamma radiation. Occup Environ Med.  
481 2011;68(6): 457-64.

482

48343-Azizova TV, Bannikova MV, Grigoryeva ES, Rybkina VL. Risk of skin cancer by

484 histological type in a cohort of workers chronically exposed to ionizing radiation.

485 Radiat Environ Biophys. 2021;60(1): 9-22.

486

487 Table 1. Data collection protocol

|                             |                                         |
|-----------------------------|-----------------------------------------|
| Epidemiological data        | Age                                     |
|                             | Gender                                  |
|                             | Council of residence                    |
|                             | Profession                              |
| Medical history             | Tobacco smoking                         |
|                             | History of cutaneous neoplasia          |
|                             | History of other neoplasia              |
|                             | Immunosuppression                       |
| Clinical data               | Location of cSCC                        |
|                             | Recurrence of previous cSCC             |
|                             | Synchronous malignant cutaneous lesions |
|                             | Rapid tumour growth                     |
|                             | Infiltration of local structures        |
|                             | Regional adenopathies                   |
| Histopathological data      | Distant metastases                      |
|                             | Maximum tumour diameter                 |
|                             | Maximum infiltration depth              |
|                             | Tumour differentiation                  |
|                             | Perineural infiltration                 |
| Lymphovascular infiltration |                                         |

488

489

490 Table 2. Professions of patients included in the study.

| <b>Profession</b>                 | <b>n (%)</b> |
|-----------------------------------|--------------|
| Agriculture and livestock rearing | 109 (38.4%)  |
| Sea farer                         | 37 (13.0%)   |
| Homemaker                         | 25 (8.8%)    |
| Construction worker               | 21 (7.4%)    |
| Shop assistant / bartender        | 21 (7.4%)    |
| Office and administrative work    | 16 (5.6%)    |
| Factory operator/mechanic         | 13 (4.6%)    |
| Carpenter                         | 6 (2.1%)     |
| Driver                            | 5 (1.8%)     |
| Teacher                           | 4 (1.4%)     |
| Cleaning staff                    | 4 (1.4%)     |
| Health worker                     | 3 (1.1%)     |
| Disabled person/pensioner         | 3 (1.1%)     |
| Miner                             | 2 (0.7%)     |
| Railway worker                    | 2 (0.7%)     |
| Police/army                       | 2 (0.7%)     |
| Builder                           | 1 (0.4%)     |
| Missing values                    | 10 (3.5%)    |

491

492

493 Table 3. Location of cSCC

494

| <b>Primary tumour location</b> | <b>n (%)</b> |
|--------------------------------|--------------|
| Cheek                          | 54 (19.0%)   |
| Frontotemporal region          | 51 (17.9%)   |
| Scalp                          | 43 (15.1%)   |
| Lower lip                      | 34 (12.0%)   |
| Ear                            | 28 (9.9%)    |
| Nose                           | 21 (7.4%)    |
| Preauricular                   | 19 (6.7%)    |
| Mandibular region              | 11 (3.9%)    |
| Retroauricular                 | 9 (3.2%)     |
| Upper lip                      | 5 (1.8%)     |
| Neck                           | 5 (1.8%)     |
| Eyelid and orbital region      | 4 (1.4%)     |



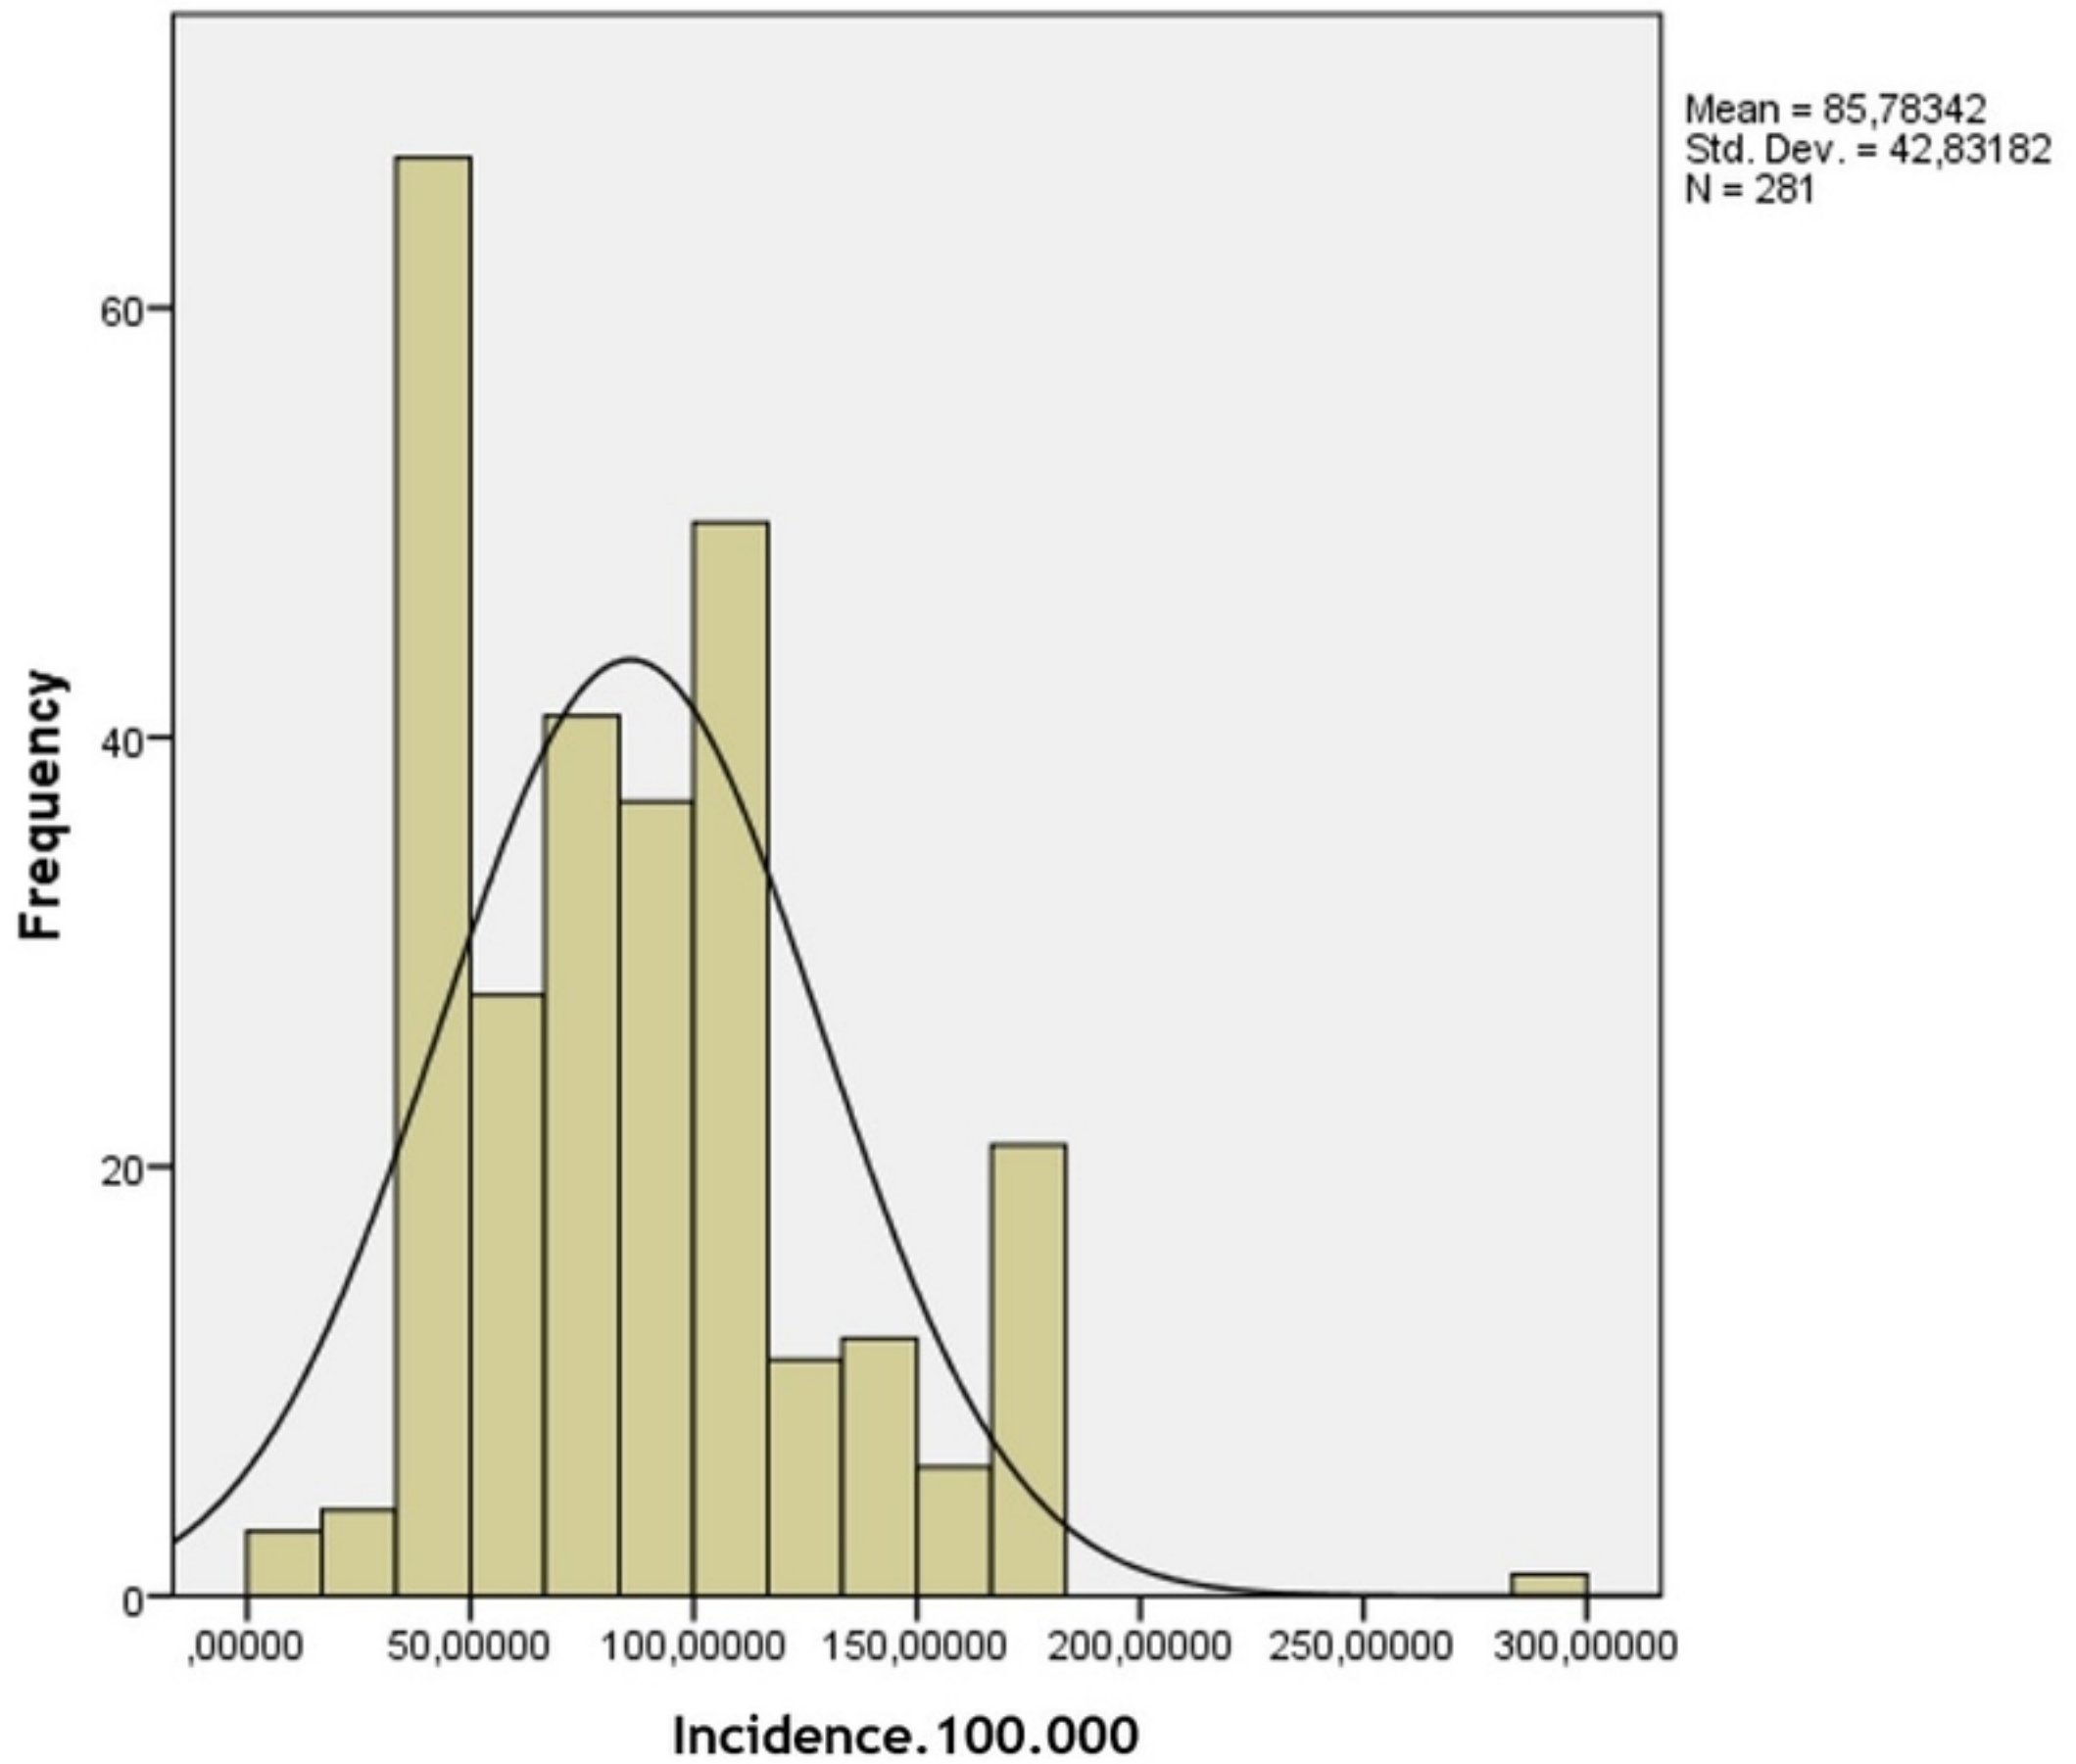

Figure-1

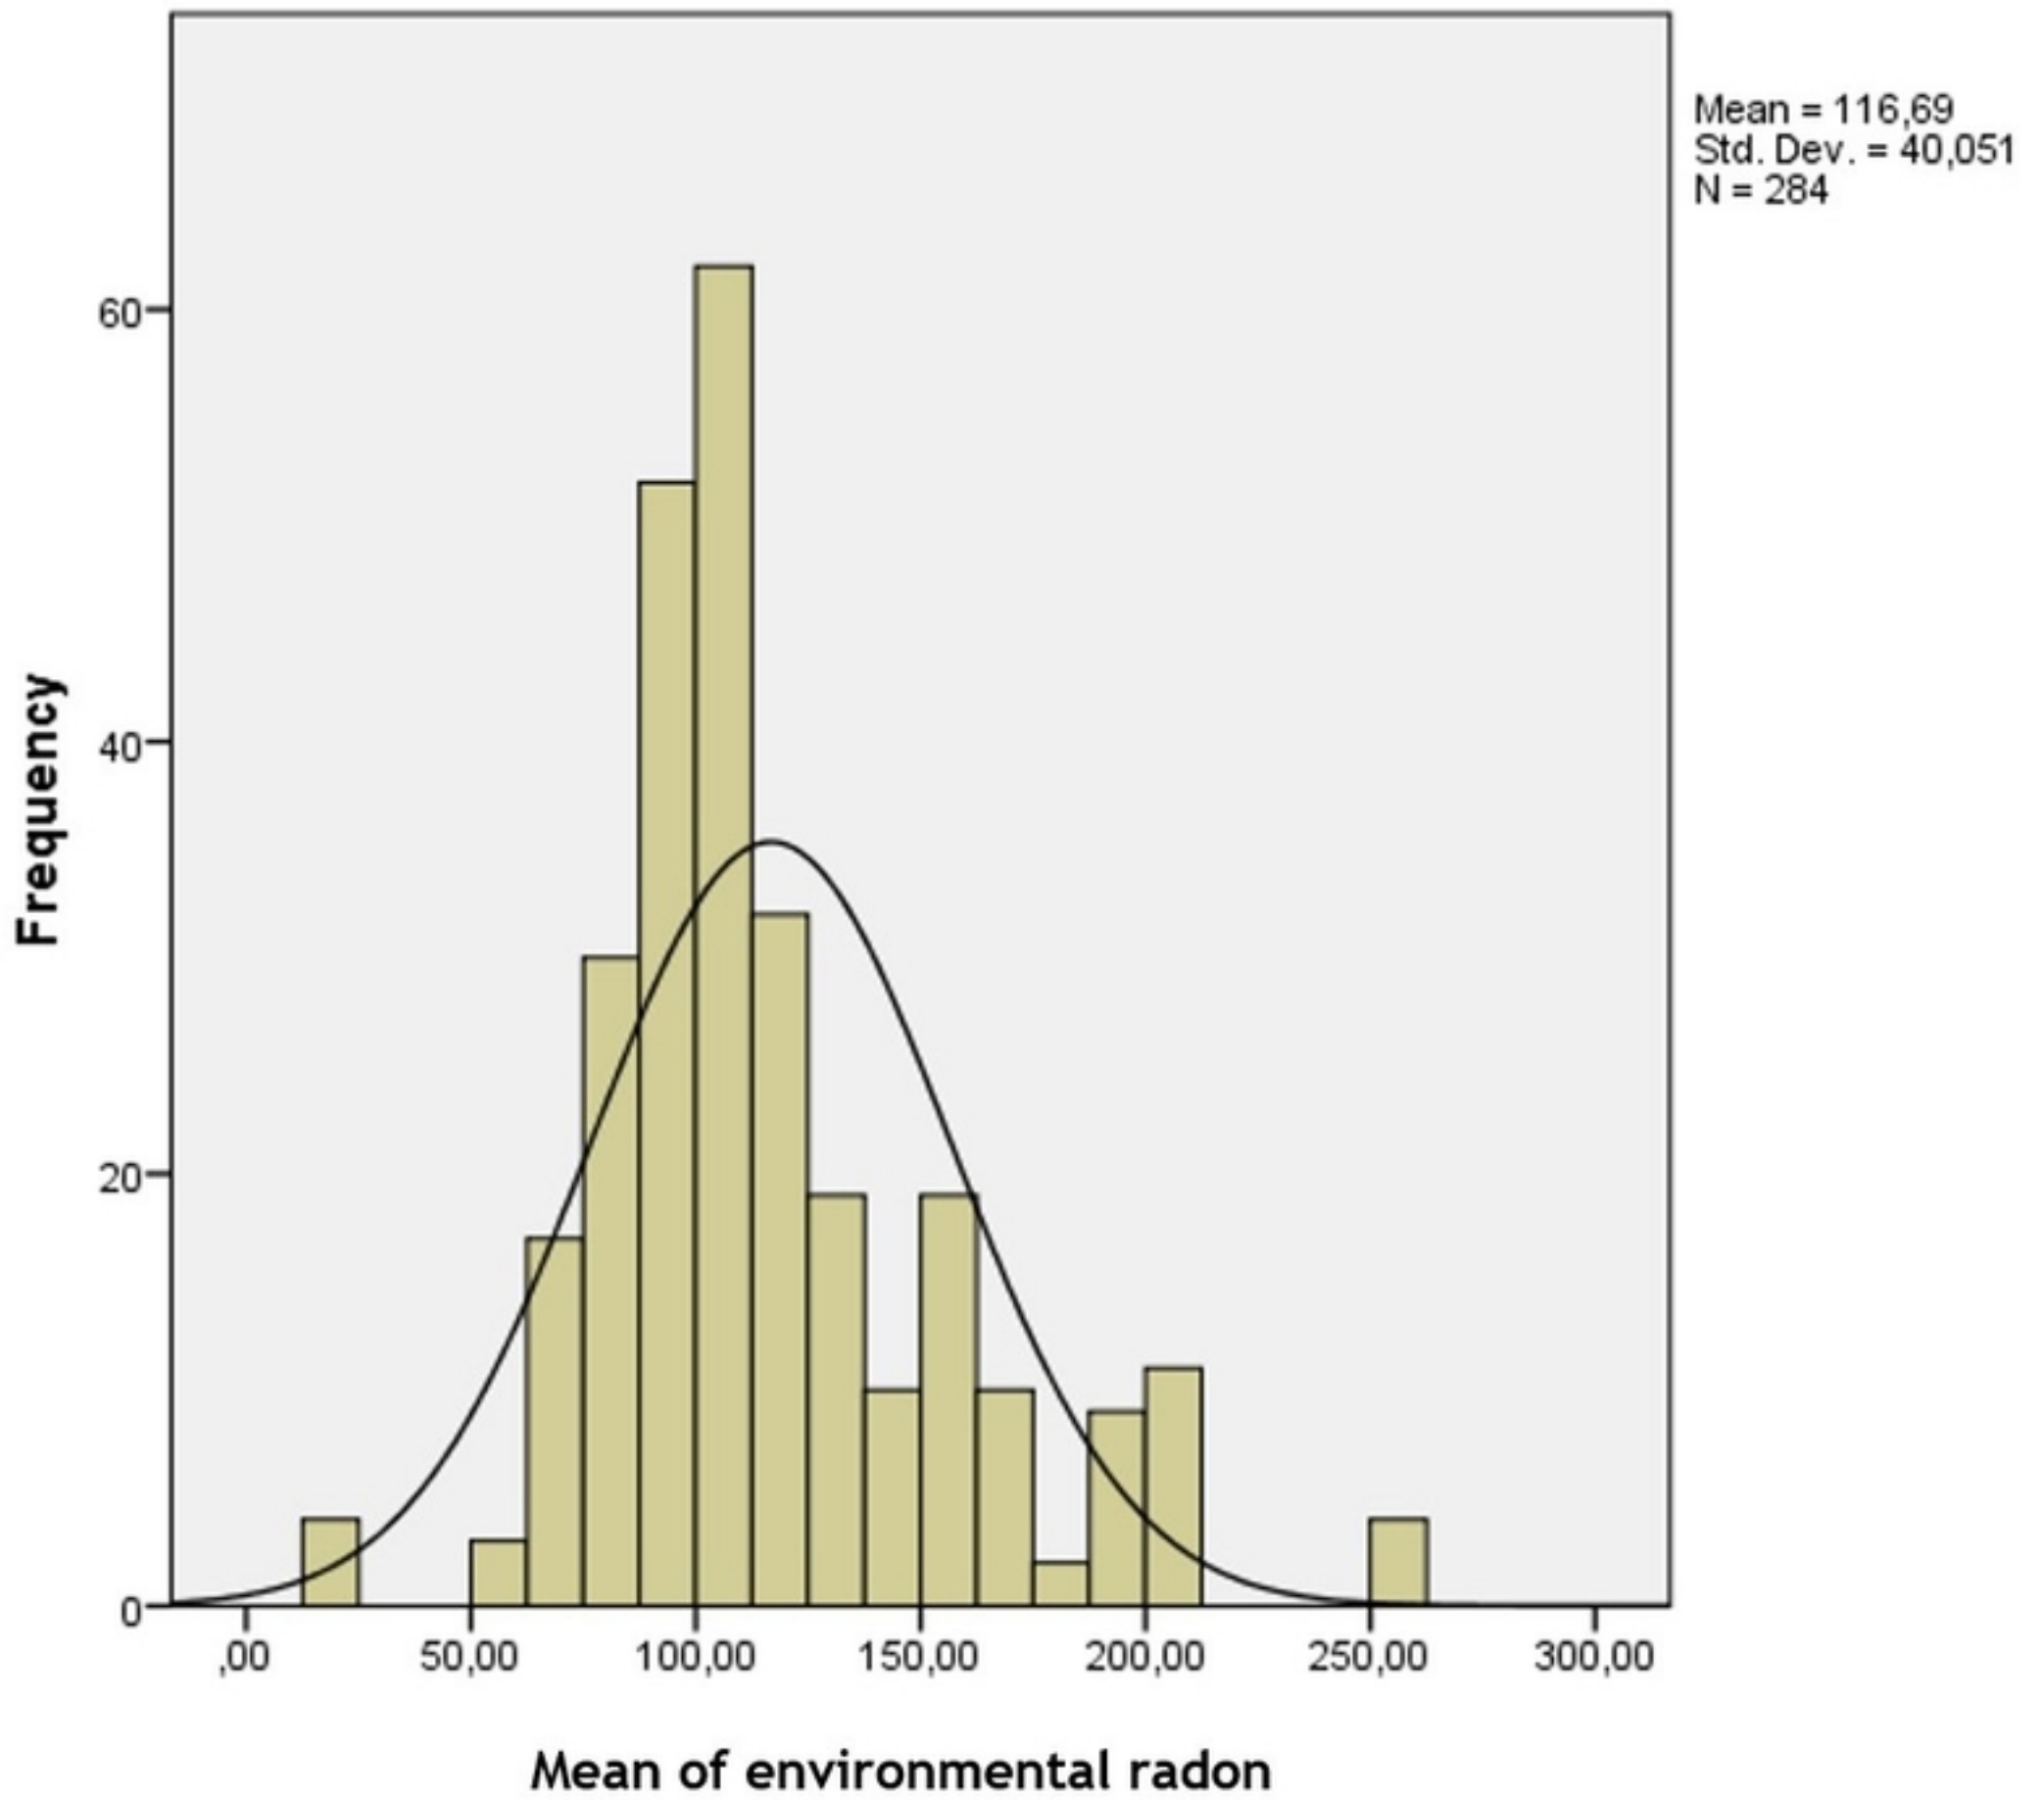

Figure-2

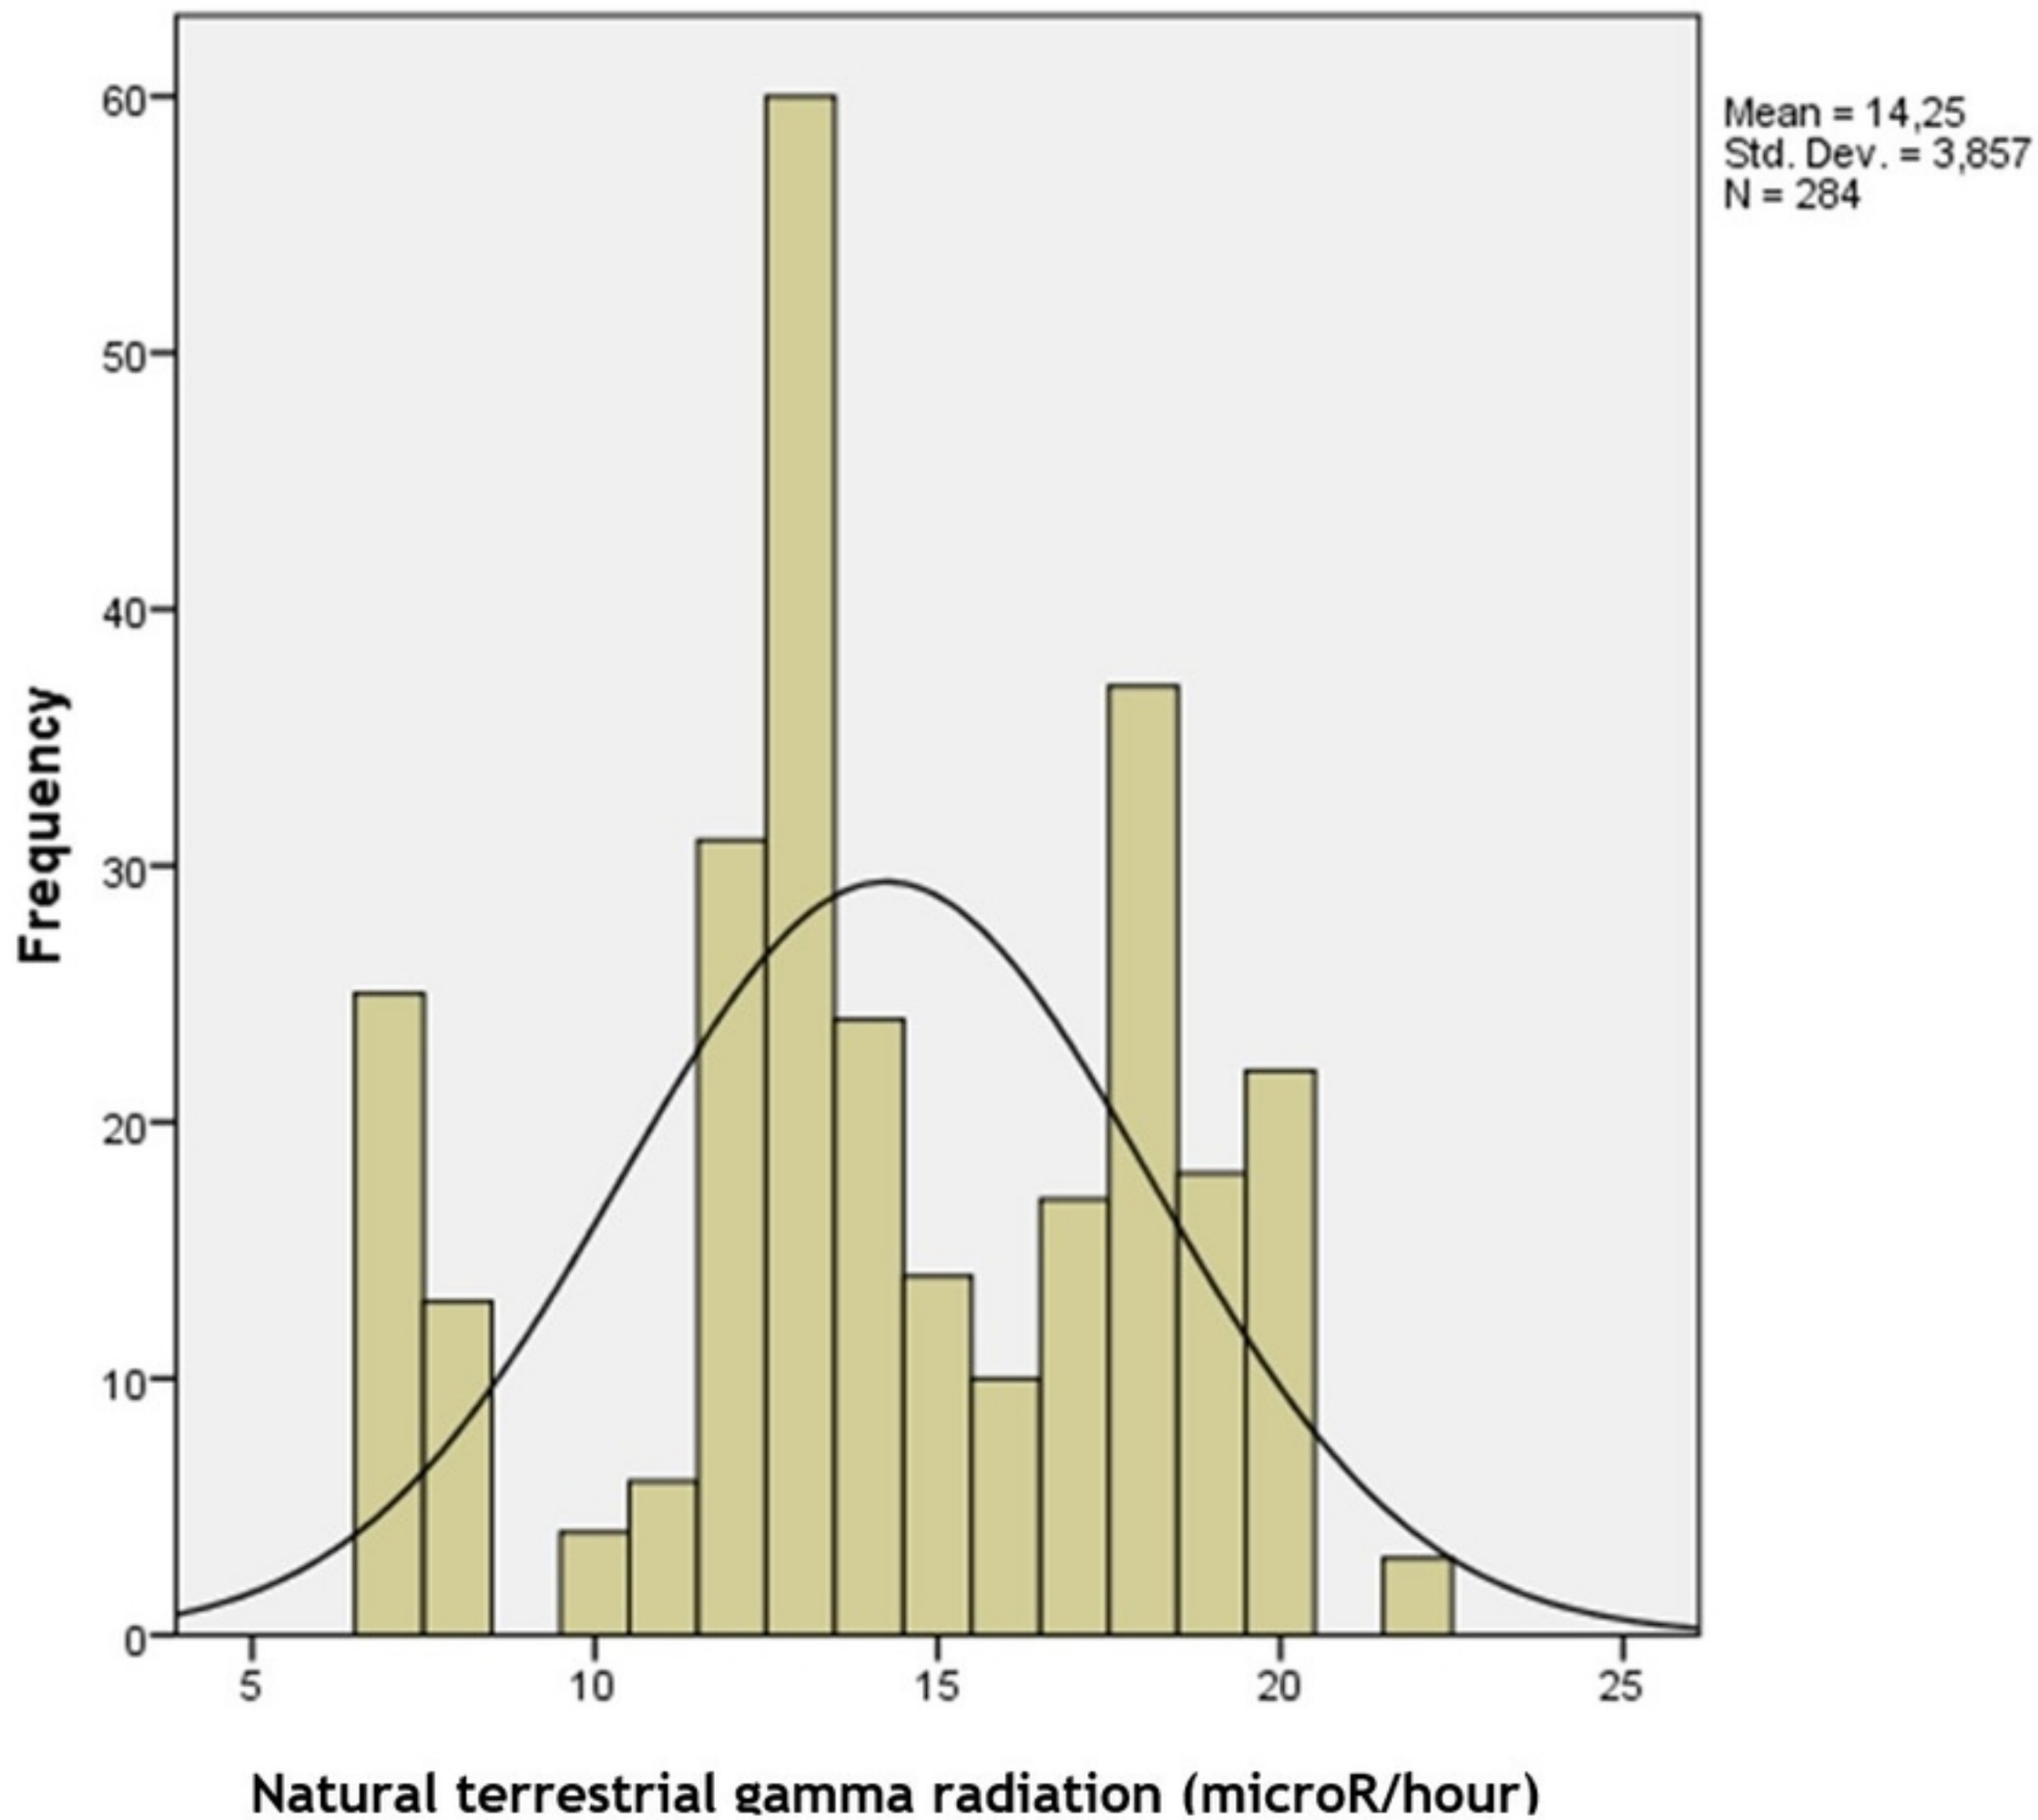

Figure-3

# Scatterplot

Dependent Variable: Global incidence

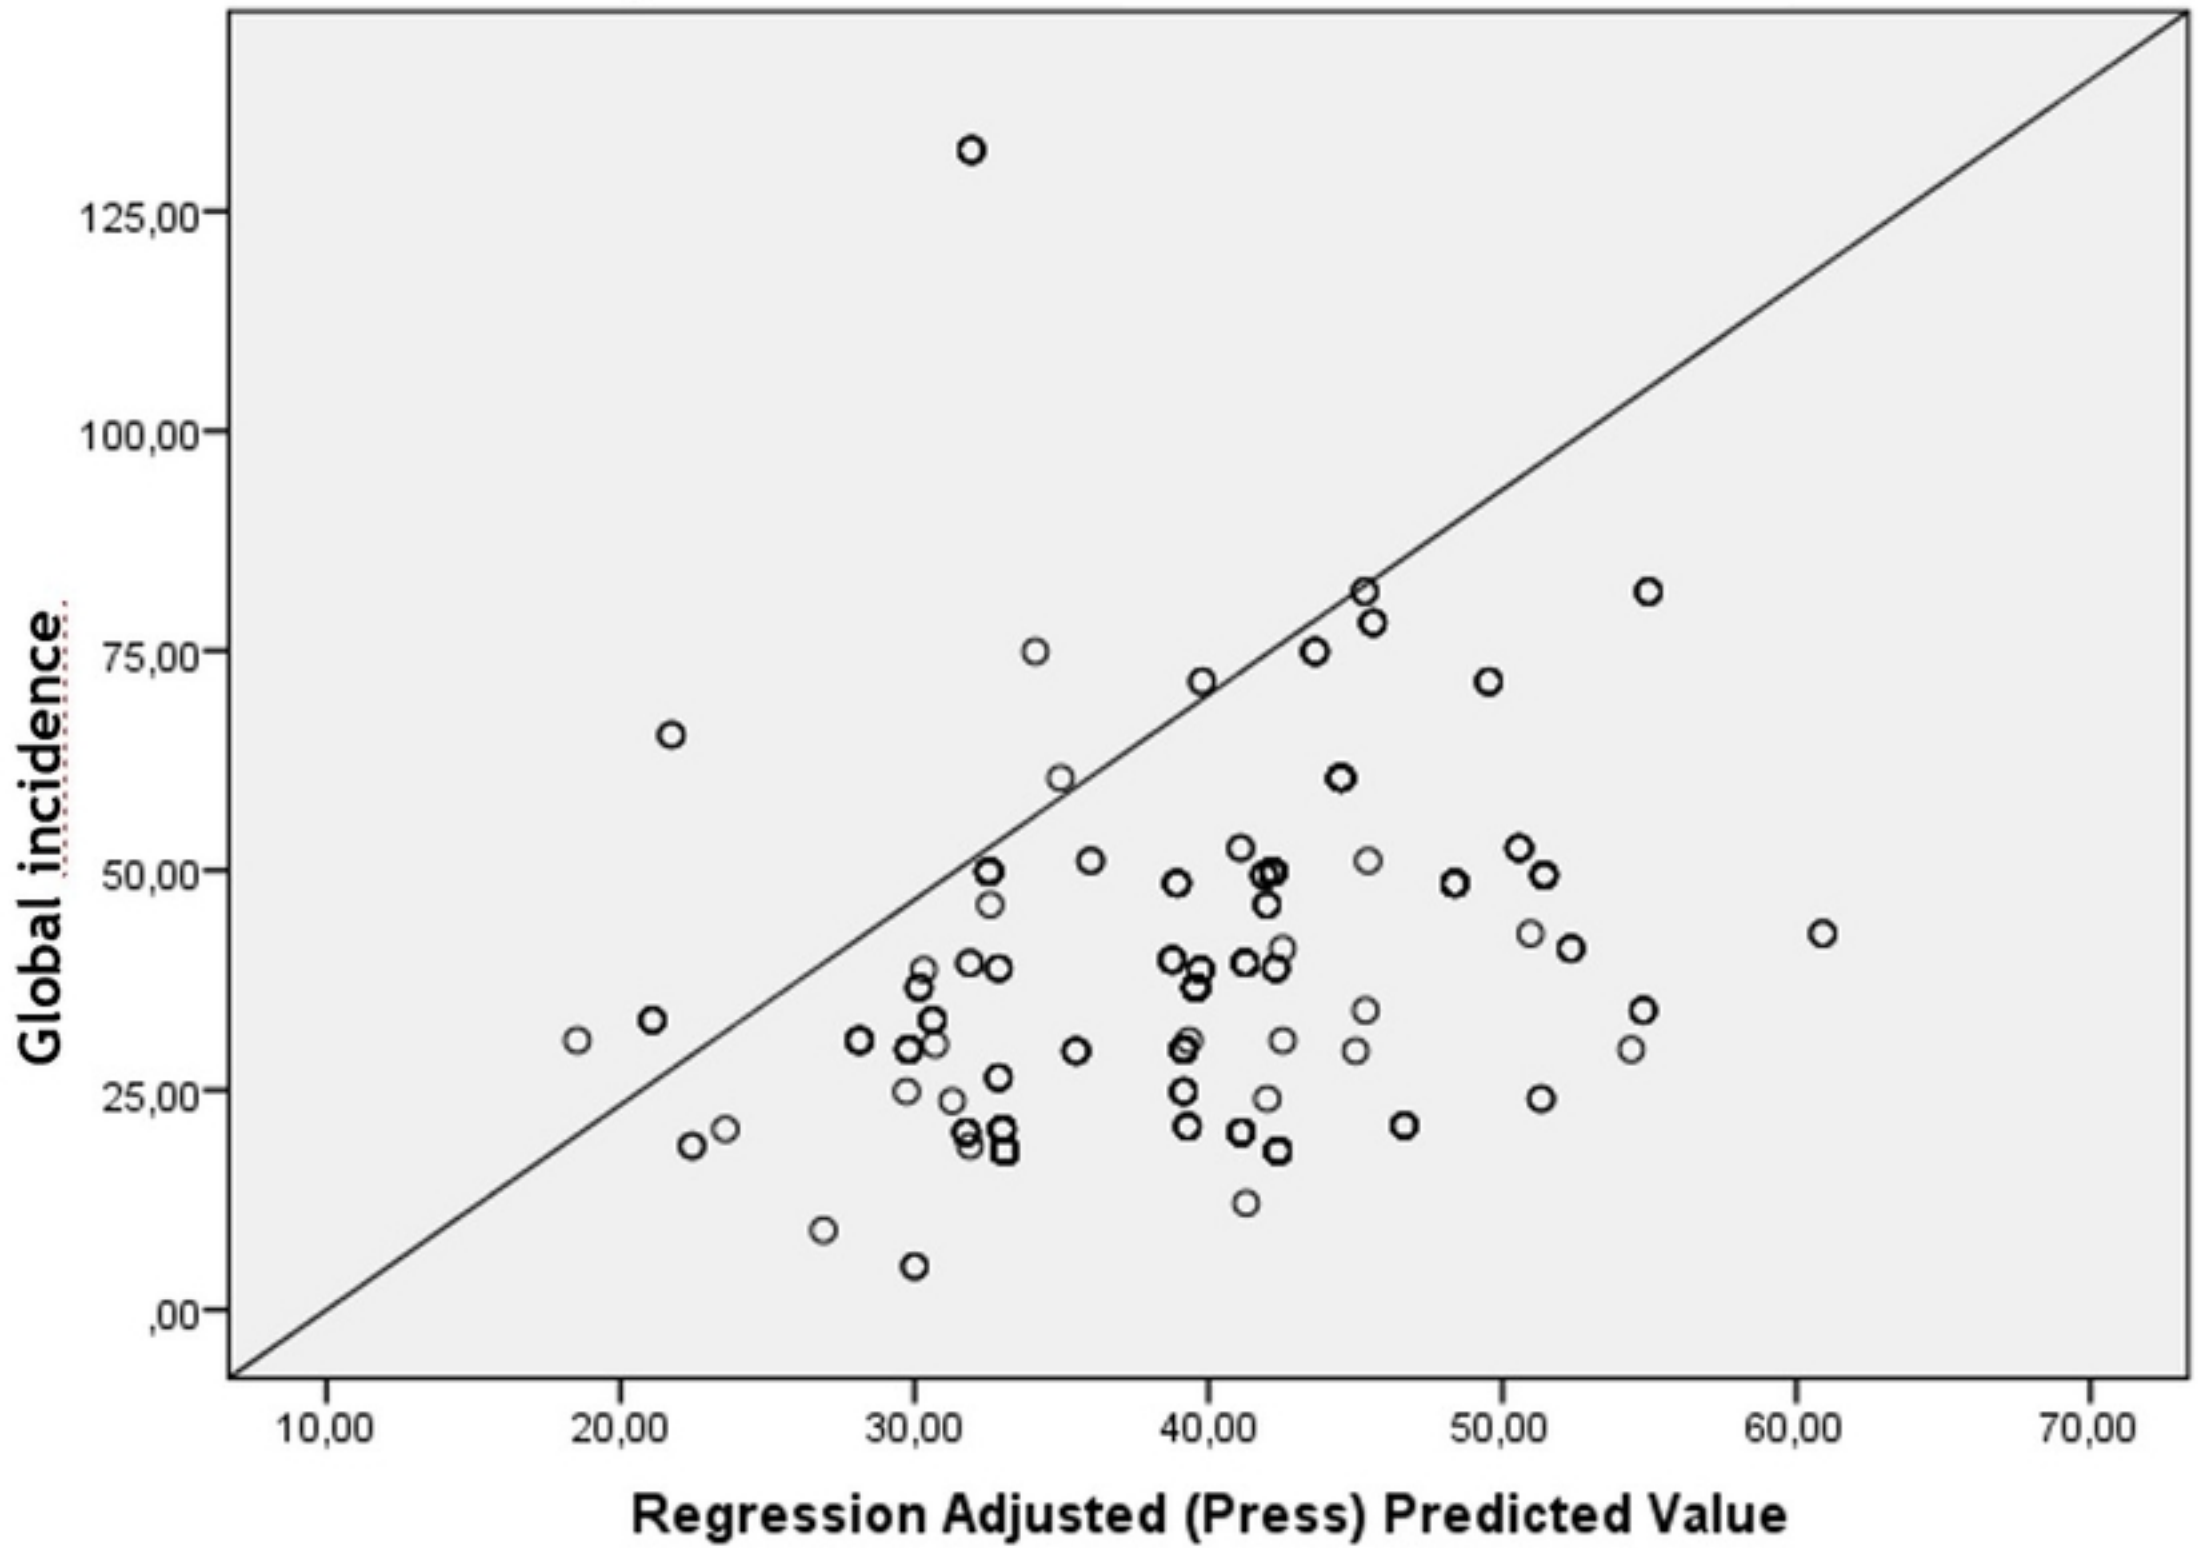

Figure-4

Figure 5. Graphic representation of natural gamma radiation emissions and head and neck sSCC incidence. The EURATOM recommended level of gamma radiation is indicated, showing that slightly more than 80% of the measurements are above the recommended values.

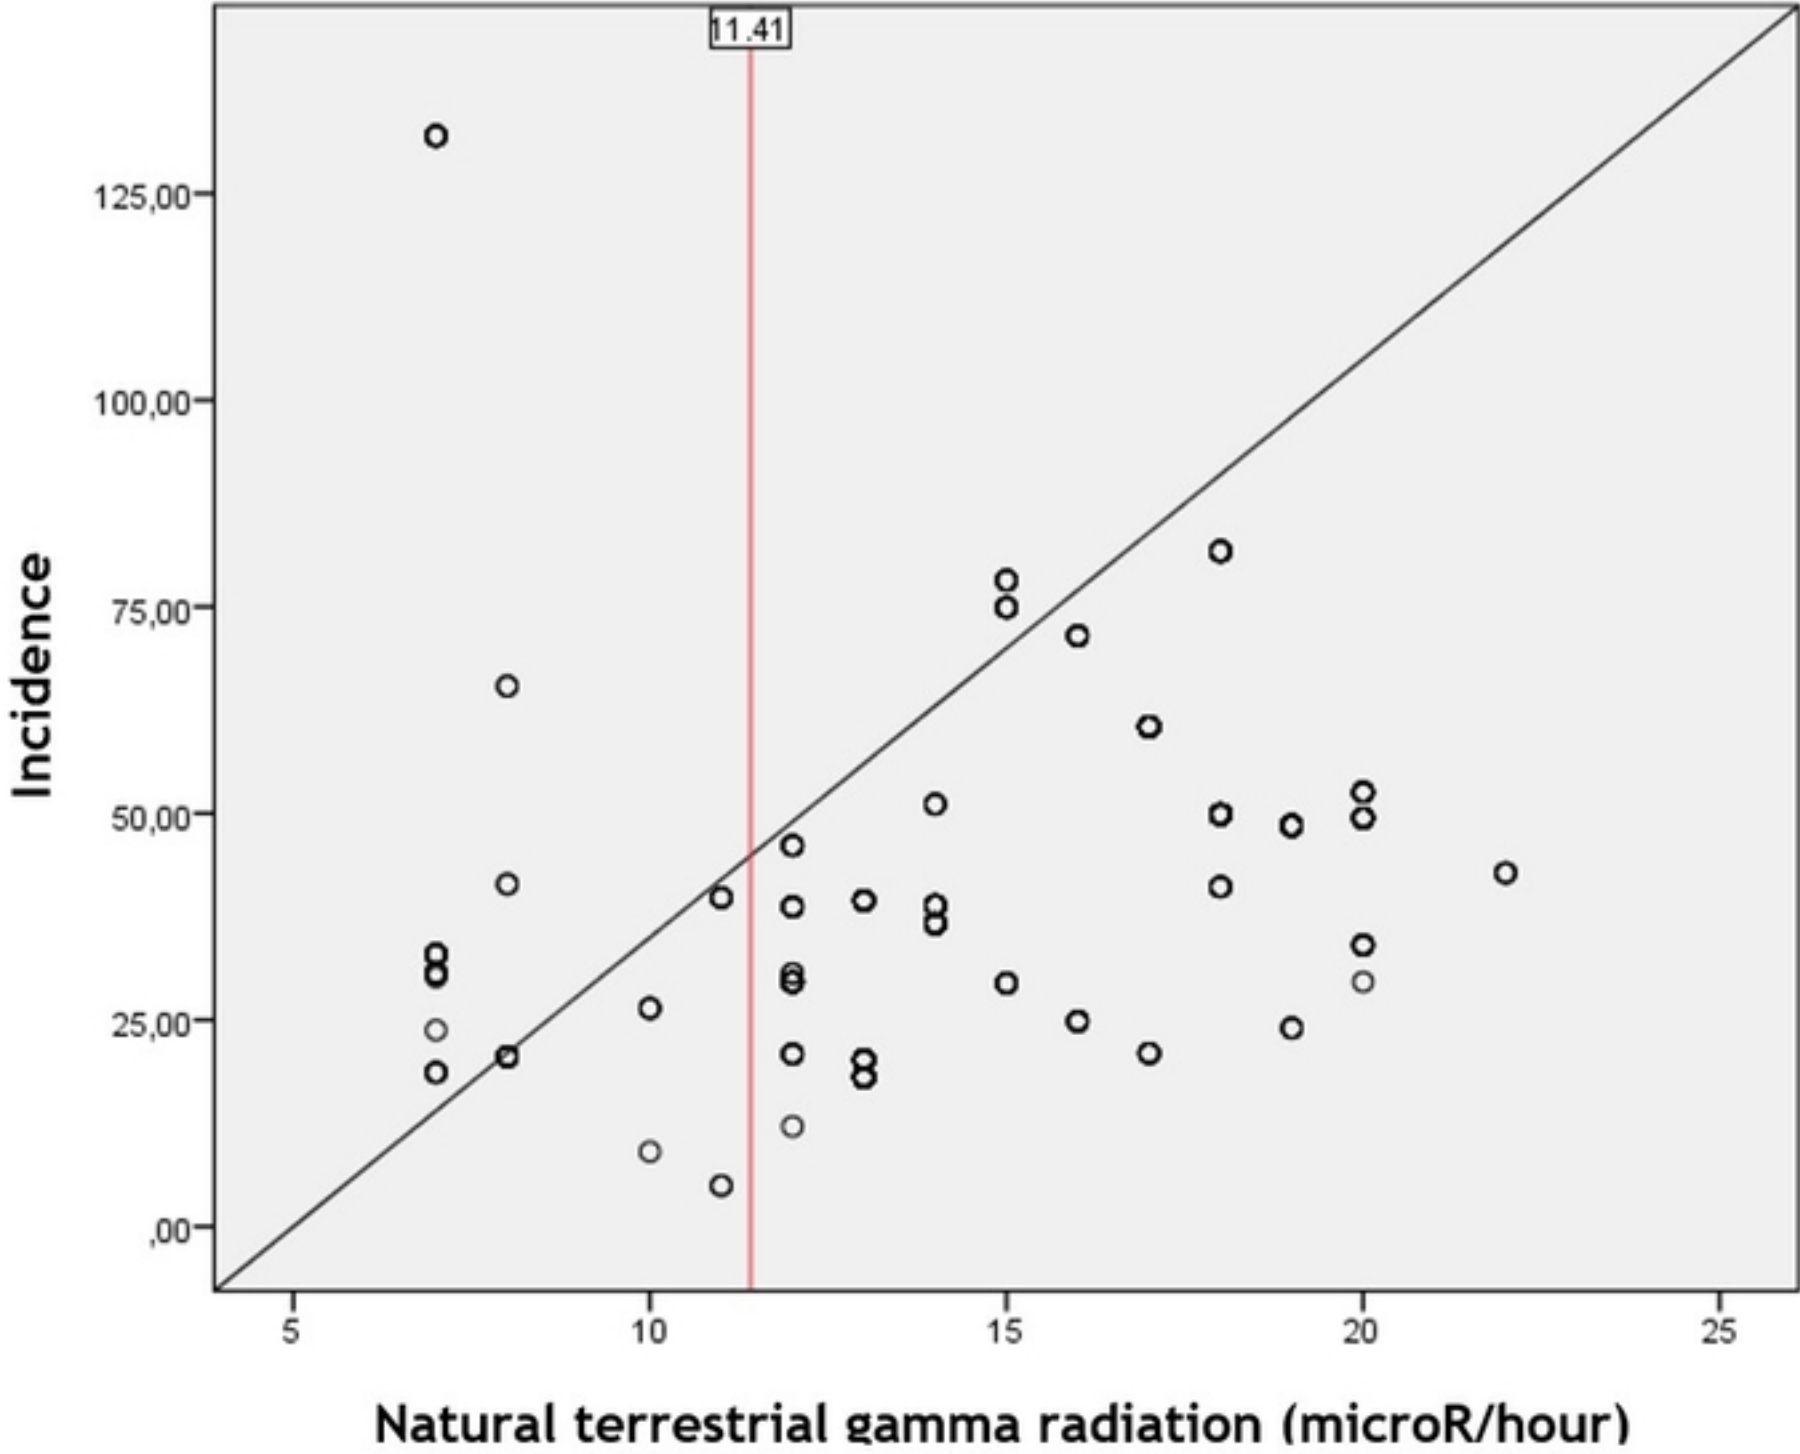

Figure-5
